# Supplementary material for: One- and two-photon induced emission in heterobimetallic ZnII–SmIII and ZnII–TbIII complexes with a side-off compartmental ligand
Source: Royal Society of Chemistry journal article supplement (doi:10.1039/c2cp41026e), 2012-01-01
Supplement: c2cp41026e.pdf [file c2cp41026e.pdf]

# One- and two-photon induced emission in heterobimetallic Zn<sup>II</sup>-Sm<sup>III</sup> and Zn<sup>II</sup>-Tb<sup>III</sup> complexes with a side-off compartmental ligand

Traian D. Pasatoiu,<sup>†</sup> Augustin M. Madalan,<sup>†</sup> Marian Zamfirescu,<sup>§</sup>

Carmen Tiseanu,<sup>\*,§</sup> and Marius Andruh<sup>\*,†</sup>

<sup>†</sup>*University of Bucharest, Faculty of Chemistry, Inorganic Chemistry  
Laboratory, Str. Dumbrova Rosie nr. 23, 020464-Bucharest, Romania;*

<sup>§</sup>*National Institute for Laser, Plasma and Radiation Physics, Laboratory  
of Solid-State Quantum Electronics, PO Box MG-36, Magurele, 077125,  
Romania*

**RECEIVED DATE (automatically inserted by publisher);**

Corresponding authors: [tiseanuc@yahoo.com](mailto:tiseanuc@yahoo.com); [marius.andruh@dnt.ro](mailto:marius.andruh@dnt.ro)

**Supplementary Information**

## I. Experimental

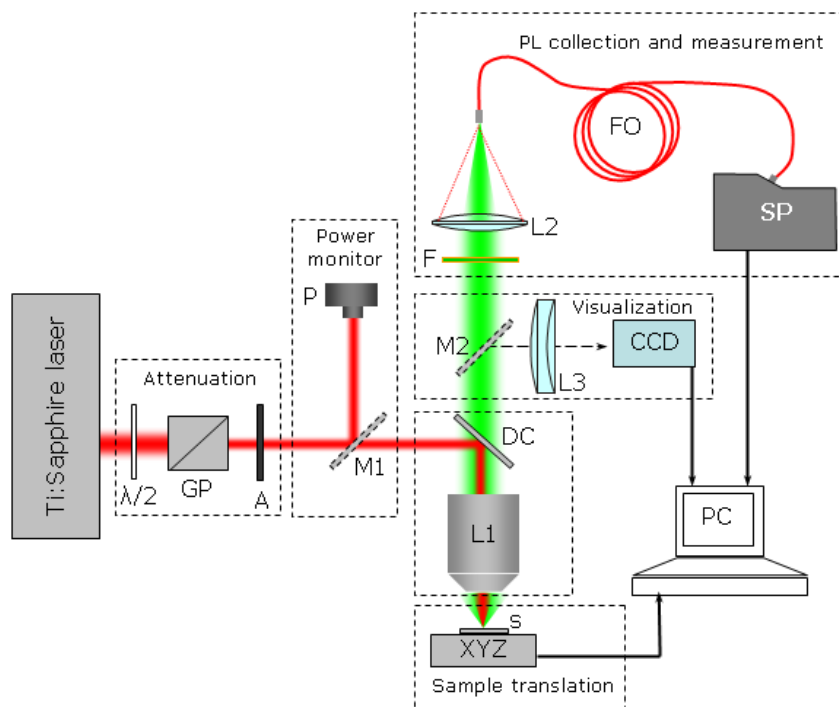

**Scheme S1.** Experimental set-up for two-photon excited photoluminescence. GP - Glan polarizer; A – neutral density filters; P – Powermeters; DC – Dichroic mirror; L1- 20x focusing lens; S – Sample; XYZ – translation stage; L2 – coupling lens; FO – optical fiber; SP - spectrometer; L3 – imaging lens; CCD – video camera.

II.

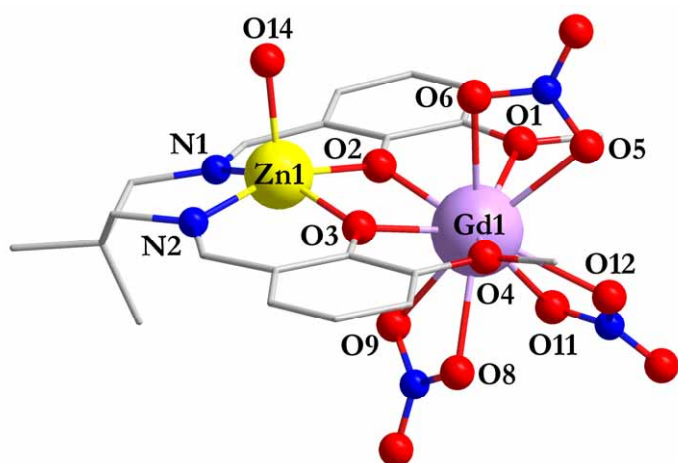

**Figure S1.** View of the molecular structures for  $[\text{Zn}(\text{H}_2\text{O})(\text{valdmpn})\text{Gd}(\text{O}_2\text{NO})_3] \cdot \text{H}_2\text{O}$  **3**.

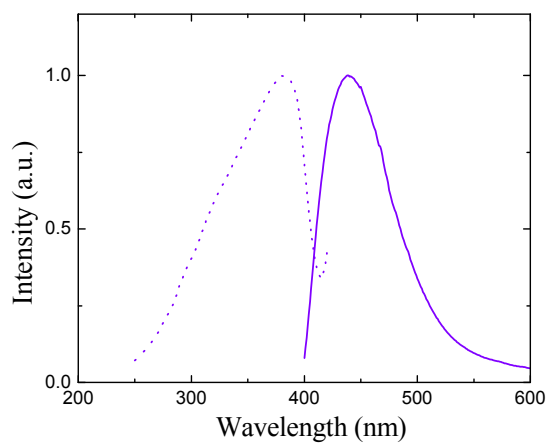

**Figure S2.** Emission (fluorescence) and excitation spectra of complex **3**  
( $\lambda_{\text{ex}} = 350$  nm and  $\lambda_{\text{em}} = 440$  nm).

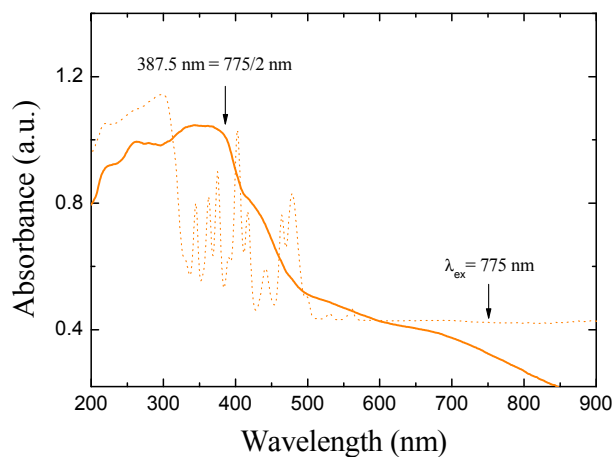

**Figure S3.** DR-UV/VIS spectra of complex **1** and Sm(NO<sub>3</sub>)<sub>3</sub>·6H<sub>2</sub>O (dotted line). The Sm<sup>III</sup> ions have an energy window, free from linear absorption, between ~ 900 to 550 nm.

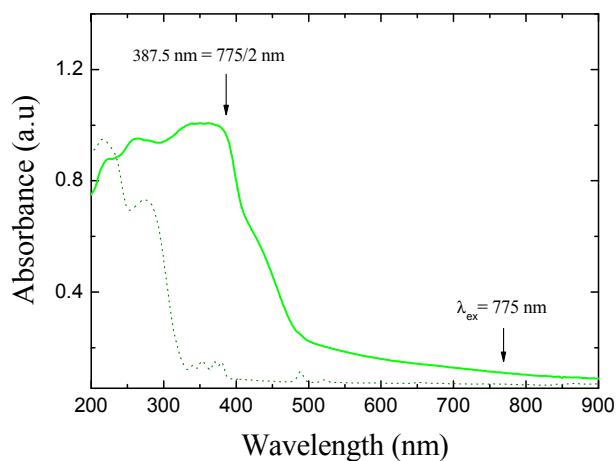

**Figure S4.** DR-UV/VIS spectra of the mixture of the **2a** + **2b** mixture and Tb(NO<sub>3</sub>)<sub>3</sub>·6H<sub>2</sub>O (dotted line). The Tb<sup>III</sup> ions have an energy window, free from linear absorption, between ~ 1600 to 490 nm. UV-VIS-NIR spectra illustrated in Figures S2 - S4 were recorded on a JASCO V-670 Spectrophotometer using crushed crystals.

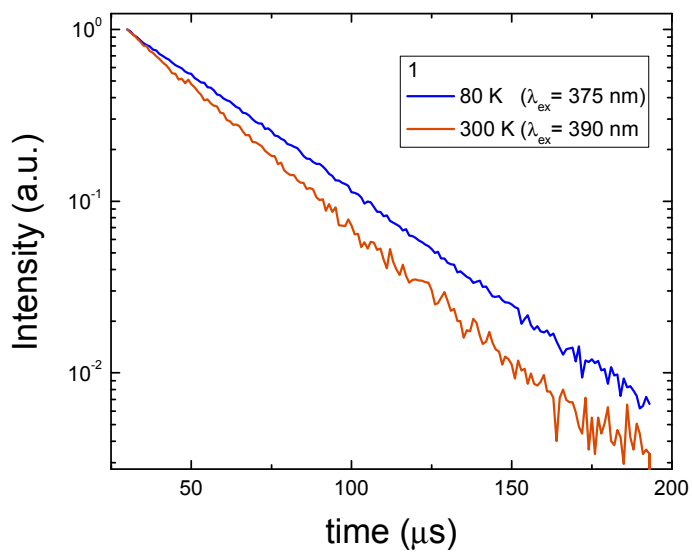

**Figure S5.** PL decays of **1** measured at 300 and 80 K.

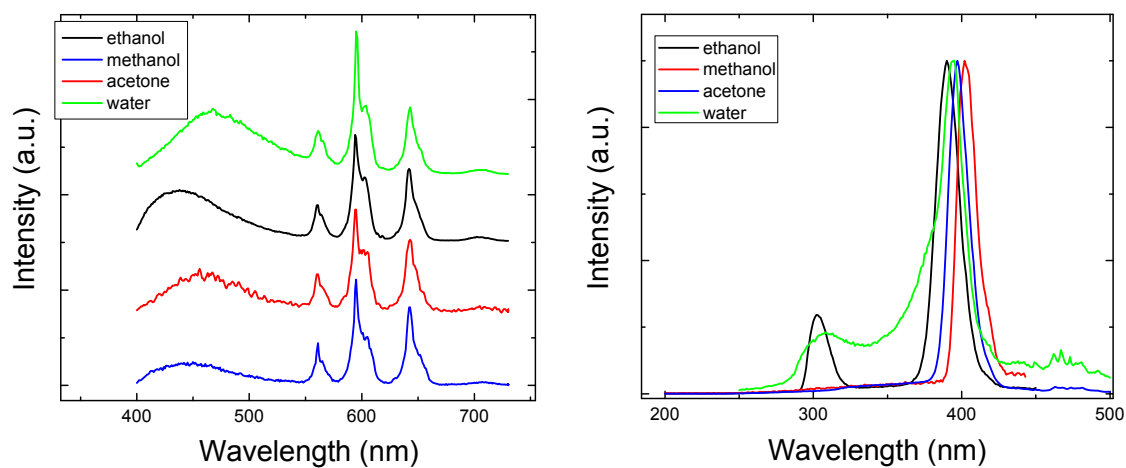

**Figure S6.** PL and excitation spectra of complex **1** in various solvents. ( $\lambda_{\text{ex}} = 390 - 400 \text{ nm}$  and  $\lambda_{\text{em}} = 593 \text{ nm}$ ) The concentration of the solutions was 5 mmol/L. PL decays were non-exponential regardless of the solvent with average PL lifetimes of few  $\mu\text{s}$  (water, ethanol and methanol) and 15- 20  $\mu\text{s}$  (acetone).
